# Supplementary material for: Assessing Lagrangian Coherence in Atmospheric Blocking
Source: Copernicus journal article supplement (doi:10.5194/egusphere-2024-2173), 2024-07-30
Supplement: Supplementary file 1 [file Assessing_Lagrangian_Coherence_in_Atmospheric_Blocking___Supplement.pdf › Assessing_Lagrangian_Coherence_in_Atmospheric_Blocking___Supplement.pdf]

## Additional Figures

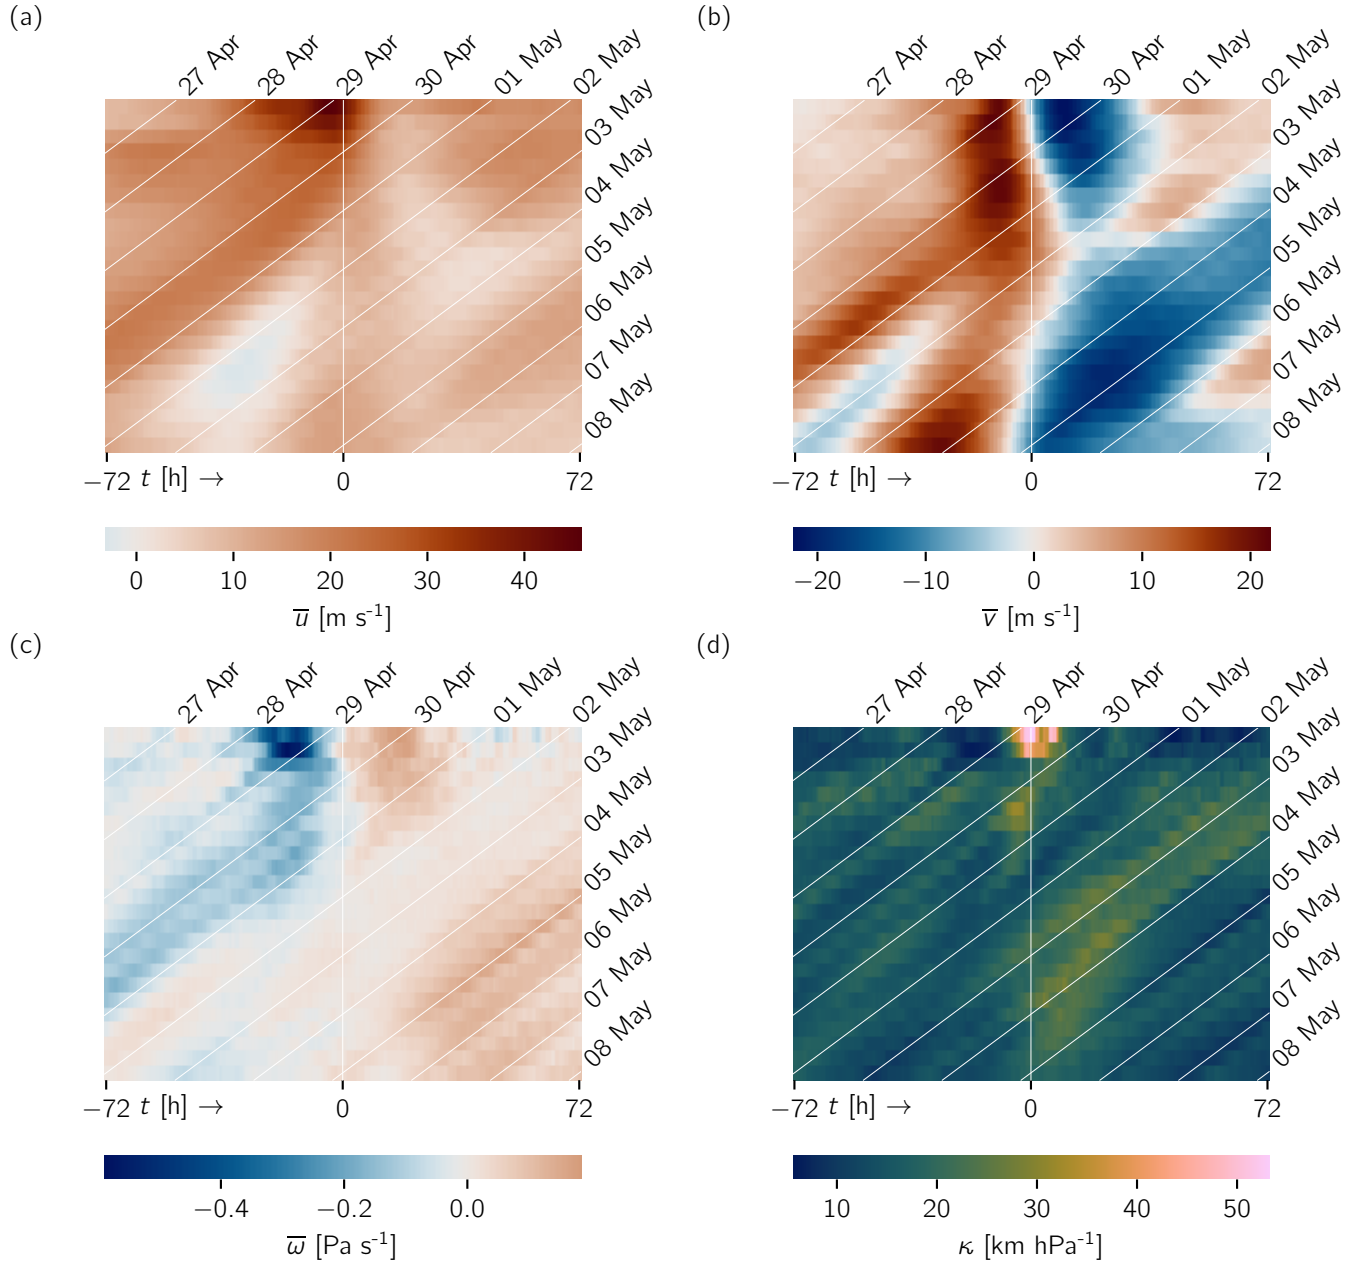

Figure S1: (a) & (b) mean average horizontal velocities, (c) average vertical velocities and (d) average  $\kappa$  plotted as a function of initialization time (24 initializations, vertical axis) and time step (144 time steps from -72 h to +72 h, horizontal axis) for the Canada 2016 case. White diagonals indicate isochrones (all 00 UTC). Vertical white line indicates initialization time.

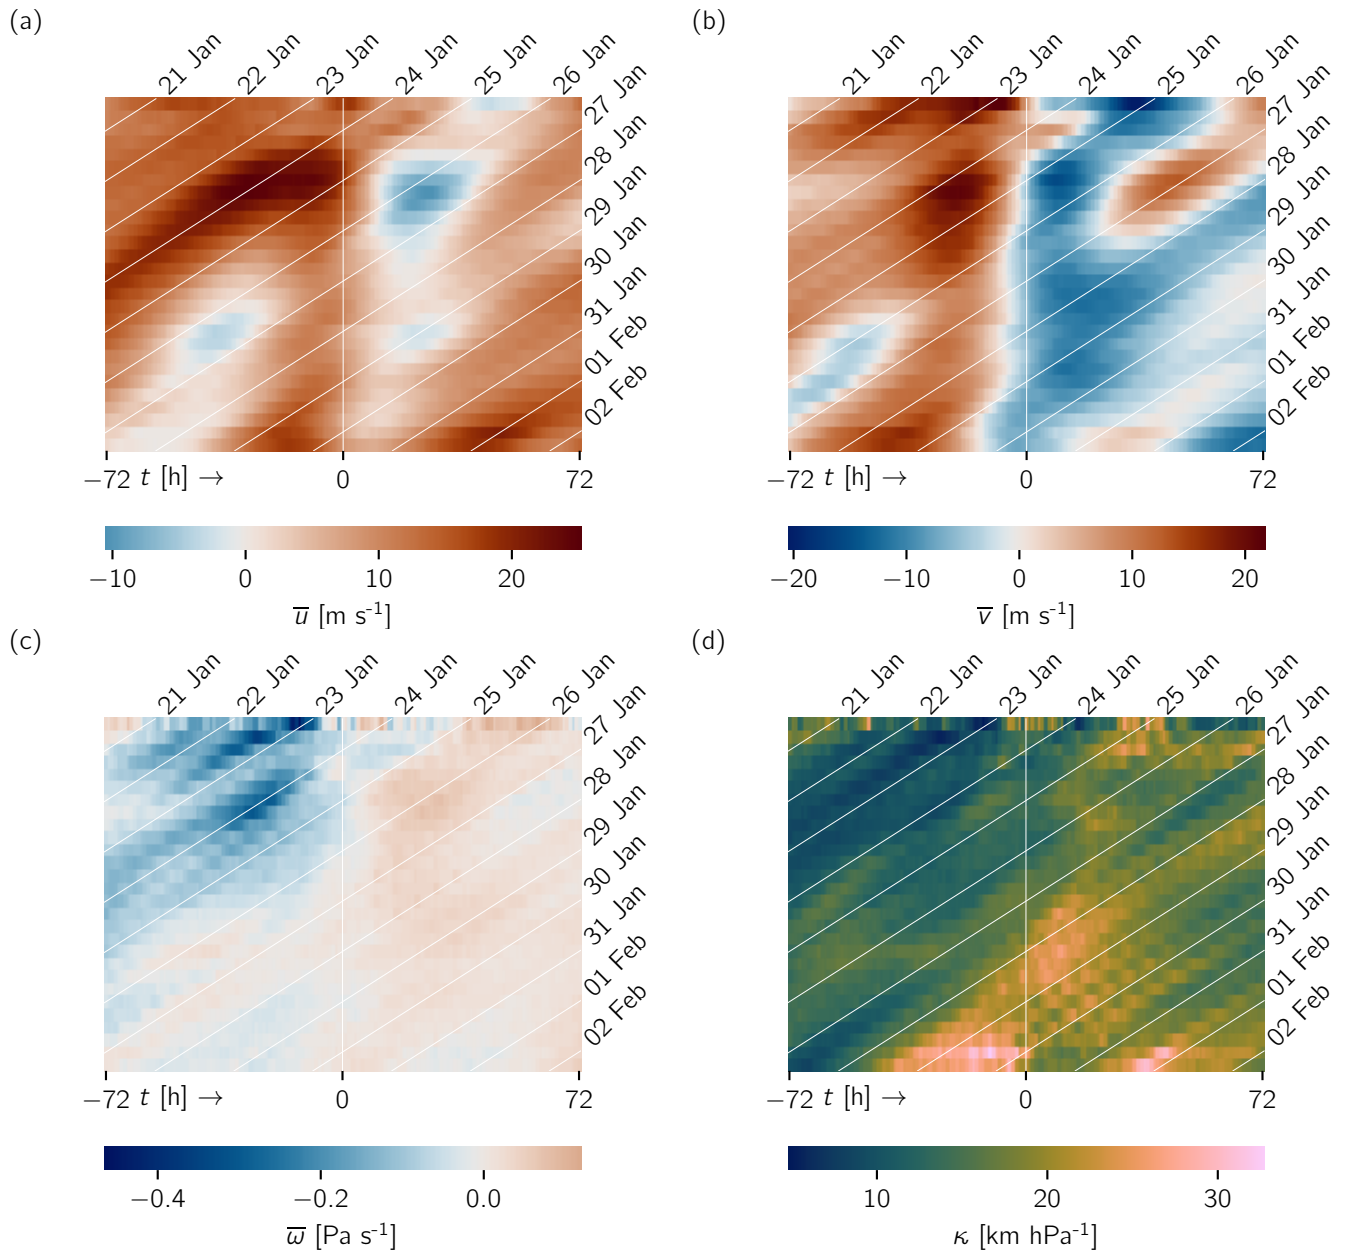

Figure S2: Same as Fig. S1, but for the 2017 Northern Europe case.

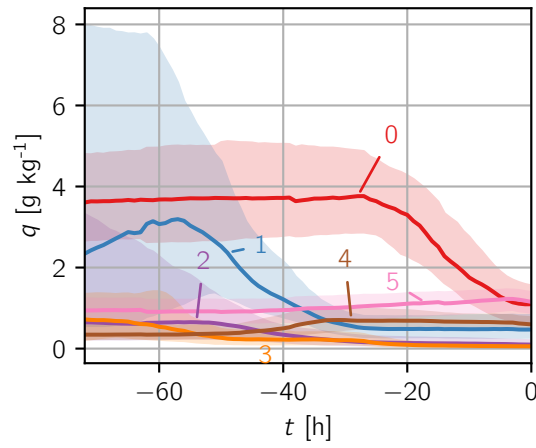

Figure S3: (a): Median (line) and interquartile range (shading) of specific humidity distribution among individual clusters from Fig. 5. Boundary point cluster (gray) not shown.

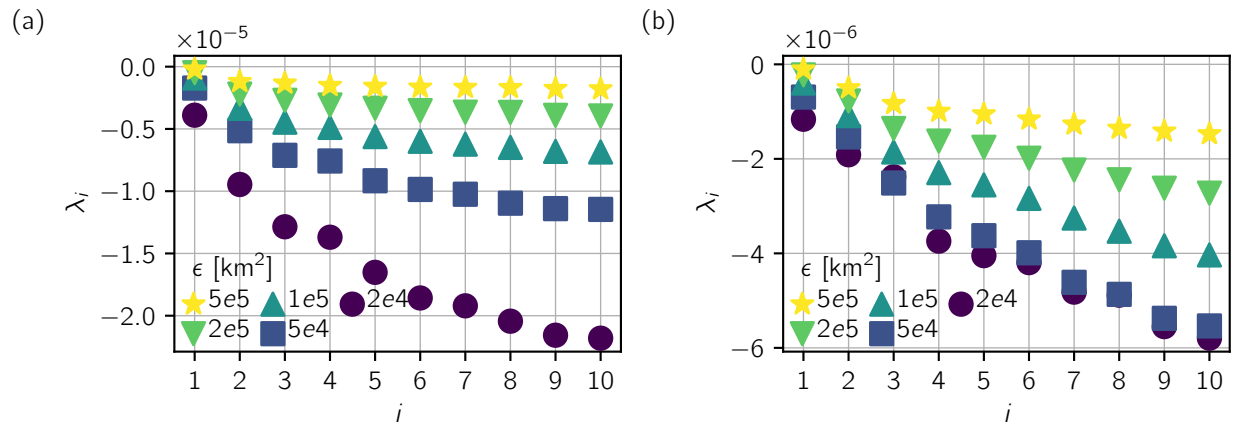

Figure S4: 10 largest eigenvalues of  $L_\epsilon$  for various values of  $\epsilon$  for trajectories initialized at (a) 04 May 2016 00 UTC and (b) 26 January 2017 18 UTC.
